# Supplementary material
Source: PubMed Central journal article supplement (PMC6053055)
Supplement: NIHMS978838-supplement-supplement_1.pdf [file NIHMS978838-supplement-supplement_1.pdf]

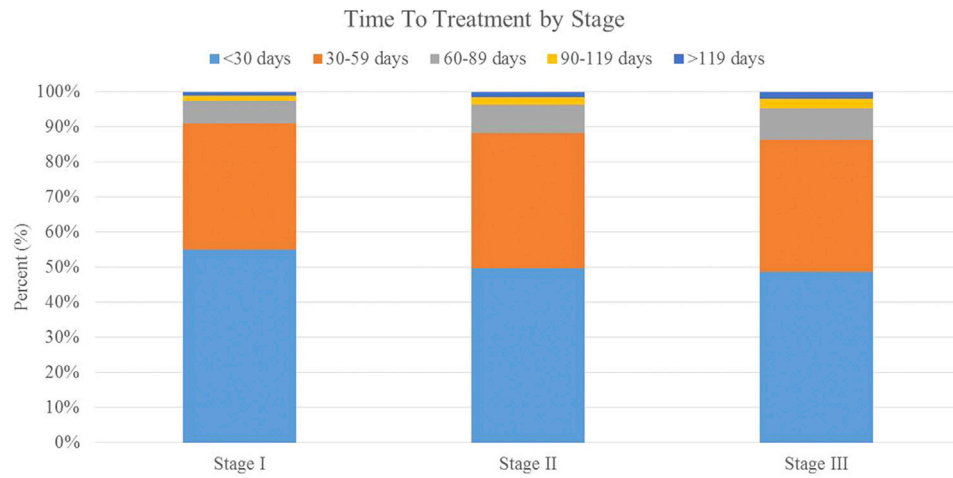

**Supplemental Fig 1.** Distribution of time to treatment by stage.

**Supplemental Table I.** Demographic characteristics

| Characteristic                         | <30 d<br>(n = 81,268) | 30-59 d<br>(n = 56,246) | 60-89 d<br>(n = 10,967) | 90-119 d<br>(n = 2779) | >119 d<br>(n = 1958) | P<br>value |
|----------------------------------------|-----------------------|-------------------------|-------------------------|------------------------|----------------------|------------|
| Age at diagnosis, y                    |                       |                         |                         |                        |                      | <.001      |
| <30                                    | 4529 (5.6)            | 2754 (4.9)              | 530 (4.8)               | 109 (3.9)              | 105 (5.4)            |            |
| 30-39                                  | 7455 (9.2)            | 4544 (8.1)              | 813 (7.4)               | 198 (7.1)              | 154 (7.9)            |            |
| 40-49                                  | 13,379 (16.5)         | 8679 (15.4)             | 1468 (13.4)             | 350 (12.6)             | 231 (11.8)           |            |
| 50-59                                  | 17,792 (21.9)         | 11,795 (21.0)           | 2294 (20.9)             | 549 (19.8)             | 394 (20.1)           |            |
| 60-69                                  | 17,282 (21.3)         | 12,200 (21.7)           | 2373 (21.6)             | 612 (22.0)             | 398 (20.3)           |            |
| 70-79                                  | 13,750 (16.9)         | 10,423 (18.5)           | 2126 (19.4)             | 565 (20.3)             | 387 (19.8)           |            |
| ≥80                                    | 7081 (8.7)            | 5851 (10.4)             | 1363 (12.4)             | 396 (14.2)             | 289 (14.8)           |            |
| Sex                                    |                       |                         |                         |                        |                      | <.001      |
| Female                                 | 35,607 (43.8)         | 23,879 (42.5)           | 4500 (41.0)             | 1124 (40.4)            | 826 (42.2)           |            |
| Male                                   | 45,661 (56.2)         | 32,367 (57.5)           | 6467 (59.0)             | 1655 (59.6)            | 1132 (57.8)          |            |
| Race                                   |                       |                         |                         |                        |                      | <.001      |
| White                                  | 79,335 (97.6)         | 54,845 (97.5)           | 10,676 (97.3)           | 2676 (96.3)            | 1883 (96.2)          |            |
| Black                                  | 318 (0.4)             | 312 (0.6)               | 90 (0.8)                | 39 (1.4)               | 32 (1.6)             |            |
| Asian                                  | 113 (0.1)             | 92 (0.2)                | 28 (0.3)                | 10 (0.4)               | 10 (0.5)             |            |
| Pacific Islander                       | 25 (0.0)              | 9 (0.0)                 | 1 (0.0)                 | 1 (0.0)                | 1 (0.1)              |            |
| American Indian, Aleutian, Eskimo      | 68 (0.1)              | 57 (0.1)                | 10 (0.1)                | 4 (0.1)                | 3 (0.2)              |            |
| Other                                  | 297 (0.4)             | 190 (0.3)               | 41 (0.4)                | 8 (0.3)                | 10 (0.5)             |            |
| Unknown                                | 1112 (1.4)            | 741 (1.3)               | 121 (1.1)               | 41 (1.5)               | 19 (1.0)             |            |
| Charlson-Deyo comorbidity score        |                       |                         |                         |                        |                      | <.001      |
| 0                                      | 72,267 (88.9)         | 49,286 (87.6)           | 9523 (86.8)             | 2345 (84.4)            | 1677 (85.6)          |            |
| 1                                      | 7717 (9.5)            | 5822 (10.4)             | 1202 (11.0)             | 357 (12.8)             | 229 (11.7)           |            |
| ≥2                                     | 1284 (1.6)            | 1138 (2.0)              | 242 (2.2)               | 77 (2.8)               | 52 (2.7)             |            |
| Insurance type/status                  |                       |                         |                         |                        |                      | <.001      |
| Medicare                               | 27,466 (33.8)         | 20,811 (37.0)           | 4359 (39.7)             | 1183 (42.6)            | 820 (41.9)           |            |
| Medicaid                               | 1323 (1.6)            | 1174 (2.1)              | 361 (3.3)               | 124 (4.5)              | 98 (5.0)             |            |
| Private insurance/managed care         | 48,124 (59.2)         | 31,103 (55.3)           | 5463 (49.8)             | 1270 (45.7)            | 866 (44.2)           |            |
| Other government                       | 653 (0.8)             | 559 (1.0)               | 125 (1.1)               | 36 (1.3)               | 34 (1.7)             |            |
| Not insured                            | 1870 (2.3)            | 1462 (2.6)              | 377 (3.4)               | 109 (3.9)              | 77 (3.9)             |            |
| Insurance status unknown               | 1832 (2.3)            | 1137 (2.0)              | 282 (2.6)               | 57 (2.1)               | 63 (3.2)             |            |
| Distance from hospital                 | 32.28 (112.93)        | 34.98 (99.96)           | 39.48 (107.76)          | 38.21 (91.61)          | 41.73 (109.60)       | <.001      |
| Facility type                          |                       |                         |                         |                        |                      | <.001      |
| Academic/research program              | 29,153 (35.9)         | 26,784 (47.6)           | 6001 (54.7)             | 1498 (53.9)            | 998 (51.0)           |            |
| Community cancer program               | 5329 (6.6)            | 2831 (5.0)              | 455 (4.1)               | 130 (4.7)              | 94 (4.8)             |            |
| Comprehensive community cancer program | 30,504 (37.5)         | 16,713 (29.7)           | 2682 (24.5)             | 715 (25.7)             | 532 (27.2)           |            |
| Integrated network cancer program      | 5217 (6.4)            | 3219 (5.7)              | 590 (5.4)               | 159 (5.7)              | 96 (4.9)             |            |
| Other                                  | 52 (0.1)              | 24 (0.0)                | 6 (0.1)                 | 1 (0.0)                | 1 (0.1)              |            |
| Unknown                                | 11,013 (13.6)         | 6675 (11.9)             | 1233 (11.2)             | 276 (9.9)              | 237 (12.1)           |            |
| Facility location                      |                       |                         |                         |                        |                      | <.001      |
| East north central                     | 11,169 (13.7)         | 8442 (15.0)             | 1847 (16.8)             | 428 (15.4)             | 291 (14.9)           |            |
| East south central                     | 6190 (7.6)            | 3027 (5.4)              | 428 (3.9)               | 121 (4.4)              | 79 (4.0)             |            |
| Middle Atlantic                        | 7978 (9.8)            | 9330 (16.6)             | 2052 (18.7)             | 513 (18.5)             | 337 (17.2)           |            |
| Mountain                               | 3744 (4.6)            | 2258 (4.0)              | 398 (3.6)               | 112 (4.0)              | 72 (3.7)             |            |
| New England                            | 4117 (5.1)            | 3502 (6.2)              | 591 (5.4)               | 170 (6.1)              | 110 (5.6)            |            |
| Pacific                                | 8130 (10.0)           | 6326 (11.2)             | 1497 (13.7)             | 455 (16.4)             | 331 (16.9)           |            |
| South Atlantic                         | 16,808 (20.7)         | 11,692 (20.8)           | 2147 (19.6)             | 497 (17.9)             | 340 (17.4)           |            |
| West North Central                     | 7821 (9.6)            | 3085 (5.5)              | 428 (3.9)               | 99 (3.6)               | 83 (4.2)             |            |
| West South Central                     | 4298 (5.3)            | 1909 (3.4)              | 346 (3.2)               | 108 (3.9)              | 78 (4.0)             |            |
| Unknown                                | 11,013 (13.6)         | 6675 (11.9)             | 1233 (11.2)             | 276 (9.9)              | 237 (12.1)           |            |
| Primary site                           |                       |                         |                         |                        |                      | <.001      |
| Head and neck                          | 14,776 (18.2)         | 12,645 (22.5)           | 3134 (28.6)             | 878 (31.6)             | 645 (32.9)           |            |
| Upper extremities                      | 21,891 (26.9)         | 14,270 (25.4)           | 2508 (22.9)             | 612 (22.0)             | 439 (22.4)           |            |
| Trunk                                  | 27,507 (33.8)         | 17,864 (31.8)           | 3186 (29.1)             | 744 (26.8)             | 483 (24.7)           |            |

Continued

**Supplemental Table I. Cont'd**

| Characteristic          | <30 d<br>(n = 81,268) | 30-59 d<br>(n = 56,246) | 60-89 d<br>(n = 10,967) | 90-119 d<br>(n = 2779) | >119 d<br>(n = 1958) | P<br>value |
|-------------------------|-----------------------|-------------------------|-------------------------|------------------------|----------------------|------------|
| Lower extremities       | 16,620 (20.5)         | 11,146 (19.8)           | 2054 (18.7)             | 524 (18.9)             | 369 (18.8)           |            |
| Not specified           | 474 (0.6)             | 321 (0.6)               | 85 (0.8)                | 21 (0.8)               | 22 (1.1)             |            |
| Laterality              |                       |                         |                         |                        |                      | <.001      |
| Left                    | 35,123 (43.2)         | 24,023 (42.7)           | 4600 (41.9)             | 1124 (40.4)            | 779 (39.8)           |            |
| Midline                 | 8486 (10.4)           | 6525 (11.6)             | 1426 (13.0)             | 390 (14.0)             | 291 (14.9)           |            |
| Right                   | 32,326 (39.8)         | 22,377 (39.8)           | 4309 (39.3)             | 1128 (40.6)            | 790 (40.3)           |            |
| Unknown                 | 5333 (6.6)            | 3321 (5.9)              | 632 (5.8)               | 137 (4.9)              | 98 (5.0)             |            |
| Histologic type         |                       |                         |                         |                        |                      | <.001      |
| Superficial spreading   | 26,264 (32.3)         | 18,058 (32.1)           | 3125 (28.5)             | 736 (26.5)             | 498 (25.4)           |            |
| Nodular                 | 8140 (10.0)           | 6350 (11.3)             | 1341 (12.2)             | 331 (11.9)             | 239 (12.2)           |            |
| Lentigo maligna         | 3487 (4.3)            | 2635 (4.7)              | 622 (5.7)               | 174 (6.3)              | 132 (6.7)            |            |
| Acral lentiginous       | 1023 (1.3)            | 1004 (1.8)              | 250 (2.3)               | 72 (2.6)               | 55 (2.8)             |            |
| Desmoplastic            | 980 (1.2)             | 1068 (1.9)              | 297 (2.7)               | 78 (2.8)               | 64 (3.3)             |            |
| Spindle                 | 919 (1.1)             | 958 (1.7)               | 219 (2.0)               | 65 (2.3)               | 51 (2.6)             |            |
| Amelanotic              | 102 (0.1)             | 74 (0.1)                | 15 (0.1)                | 3 (0.1)                | 2 (0.1)              |            |
| Other                   | 630 (0.8)             | 501 (0.9)               | 110 (1.0)               | 22 (0.8)               | 17 (0.9)             |            |
| Unspecified             | 39,723 (48.9)         | 25,598 (45.5)           | 4988 (45.5)             | 1298 (46.7)            | 900 (46.0)           |            |
| Breslow depth           |                       |                         |                         |                        |                      | <.001      |
| <1 mm                   | 45,525 (56.0)         | 29,018 (51.6)           | 5183 (47.3)             | 1259 (45.3)            | 925 (47.2)           |            |
| 1.01-2.00 mm            | 1,7350 (21.3)         | 12,548 (22.3)           | 2395 (21.8)             | 603 (21.7)             | 373 (19.1)           |            |
| 2.01-4 mm               | 10,289 (12.7)         | 7893 (14.0)             | 1651 (15.1)             | 402 (14.5)             | 274 (14.0)           |            |
| >4 mm                   | 5969 (7.3)            | 5410 (9.6)              | 1429 (13.0)             | 415 (14.9)             | 301 (15.4)           |            |
| Not specified           | 2135 (2.6)            | 1377 (2.4)              | 309 (2.8)               | 100 (3.6)              | 85 (4.3)             |            |
| Ulceration              |                       |                         |                         |                        |                      | <.001      |
| Not present             | 63,033 (77.6)         | 43,423 (77.2)           | 8243 (75.2)             | 2014 (72.5)            | 1404 (71.7)          |            |
| Present                 | 1319 (1.6)            | 1005 (1.8)              | 256 (2.3)               | 64 (2.3)               | 44 (2.2)             |            |
| Unknown                 | 16,916 (20.8)         | 11,818 (21.0)           | 2468 (22.5)             | 701 (25.2)             | 510 (26.0)           |            |
| Lymphovascular invasion |                       |                         |                         |                        |                      | <.001      |
| Not present             | 22,525 (27.7)         | 16,374 (29.1)           | 3088 (28.2)             | 777 (28.0)             | 521 (26.6)           |            |
| Present                 | 1212 (1.5)            | 968 (1.7)               | 236 (2.2)               | 62 (2.2)               | 46 (2.3)             |            |
| Unknown                 | 57,531 (70.8)         | 38,904 (69.2)           | 7643 (69.7)             | 1940 (69.8)            | 1391 (71.0)          |            |
| TNM pathologic stage    |                       |                         |                         |                        |                      | <.001      |
| Stage I                 | 55,309 (68.1)         | 36,167 (64.3)           | 6478 (59.1)             | 1518 (54.6)            | 1082 (55.3)          |            |
| Stage II                | 15,725 (19.3)         | 12,194 (21.7)           | 2600 (23.7)             | 685 (24.6)             | 464 (23.7)           |            |
| Stage III               | 10,234 (12.6)         | 7885 (14.0)             | 1889 (17.2)             | 576 (20.7)             | 412 (21.0)           |            |
| Living status           |                       |                         |                         |                        |                      | <.001      |
| Alive                   | 67,635 (83.2)         | 45,913 (81.6)           | 8591 (78.3)             | 2103 (75.7)            | 1453 (74.2)          |            |
| Dead                    | 1,3633(16.8)          | 10,333(18.4)            | 2376 (21.7)             | 676 (24.3)             | 505 (25.8)           |            |
| Year of diagnosis       |                       |                         |                         |                        |                      | <.001      |
| 2004                    | 7732 (9.5)            | 4653 (8.3)              | 875 (8.0)               | 219 (7.9)              | 168 (8.6)            |            |
| 2005                    | 8344 (10.3)           | 5488 (9.8)              | 1047 (9.5)              | 254 (9.1)              | 186 (9.5)            |            |
| 2006                    | 8864 (10.9)           | 5757 (10.2)             | 1127 (10.3)             | 313 (11.3)             | 213 (10.9)           |            |
| 2007                    | 8629 (10.6)           | 6027 (10.7)             | 1204 (11.0)             | 288 (10.4)             | 216 (11.0)           |            |
| 2008                    | 8441 (10.4)           | 6229 (11.1)             | 1204 (11.0)             | 305 (11.0)             | 208 (10.6)           |            |
| 2009                    | 8777 (10.8)           | 6261 (11.1)             | 1311 (12.0)             | 318 (11.4)             | 220 (11.2)           |            |
| 2010                    | 9560 (11.8)           | 6534 (11.6)             | 1249 (11.4)             | 302 (10.9)             | 218 (11.1)           |            |
| 2011                    | 10,286 (12.7)         | 7219 (12.8)             | 1346 (12.3)             | 377 (13.6)             | 266 (13.6)           |            |
| 2012                    | 10,635 (13.1)         | 8078 (14.4)             | 1604 (14.6)             | 403 (14.5)             | 263 (13.4)           |            |

**Supplemental Table II.** Multivariate analysis of overall survival across all stages

| Characteristic                         | Hazard Ratio | 95% CI    | P value |
|----------------------------------------|--------------|-----------|---------|
| Age at diagnosis                       |              |           |         |
| <30                                    | Reference    |           |         |
| 30-39                                  | 1.22         | 1.08-1.38 | .001    |
| 40-49                                  | 1.34         | 1.08-1.65 | .007    |
| 50-59                                  | 1.61         | 1.31-1.98 | <.001   |
| 60-69                                  | 2.03         | 1.64-2.49 | <.001   |
| 70-79                                  | 3.24         | 2.63-4.00 | <.001   |
| ≥80                                    | 6.31         | 5.11-7.78 | <.001   |
| Sex                                    |              |           |         |
| Female                                 | Reference    |           |         |
| Male                                   | 1.37         | 1.33-1.41 | <.001   |
| Charlson-Deyo comorbidity score        |              |           |         |
| 0                                      | Reference    |           |         |
| 1                                      | 1.29         | 1.24-1.33 | <.001   |
| ≥2                                     | 2.08         | 1.96-2.20 | <.001   |
| Insurance type/status                  |              |           |         |
| Unknown                                | Reference    |           |         |
| Medicaid                               | 1.64         | 1.46-1.83 | <.001   |
| Medicare                               | 1.13         | 1.04-1.24 | .03     |
| Not insured                            | 1.35         | 1.21-1.51 | <.001   |
| Other government                       | 1.18         | 1.01-1.38 | .14     |
| Private insurance/managed care         | 0.83         | 0.76-0.90 | <.001   |
| Facility type (%)                      |              |           |         |
| Academic/research program              | Reference    |           |         |
| Community cancer program               | 1.18         | 1.13-1.24 | <.001   |
| Comprehensive community cancer program | 1.06         | 1.03-1.09 | <.001   |
| Integrated network cancer program      | 1.11         | 1.05-1.16 | <.001   |
| Other                                  | 0.88         | 0.47-1.63 | .62     |
| Facility location (%)                  |              |           |         |
| East north central                     | Reference    |           |         |
| East south central                     | 1.18         | 1.12-1.24 | <.001   |
| Middle Atlantic                        | 0.94         | 0.90-0.99 | .02     |
| Mountain                               | 1.00         | 0.94-1.06 | .97     |
| New England                            | 0.92         | 0.87-0.97 | .007    |
| Pacific                                | 0.92         | 0.88-0.97 | <.001   |
| South Atlantic                         | 1.01         | 0.97-1.05 | .77     |
| West north central                     | 0.99         | 0.94-1.04 | .47     |
| West south central                     | 1.10         | 1.04-1.17 | <.001   |
| Unknown                                | 0.81         | 0.67-0.98 | .03     |
| Primary site                           |              |           |         |
| Head and neck                          | Reference    |           |         |
| Lower extremities                      | 0.71         | 0.68-0.74 | <.001   |
| Overlapping                            | 0.71         | 0.56-1.11 | <.001   |
| Trunk                                  | 0.85         | 0.82-0.89 | <.001   |
| Upper extremities                      | 0.77         | 0.74-0.80 | <.001   |
| Not specified                          | 0.88         | 0.77-1.02 | .03     |

Continued

**Supplemental Table II.** Cont'd

| Characteristic          | Hazard Ratio | 95% CI    | P value |
|-------------------------|--------------|-----------|---------|
| Laterality              |              |           |         |
| Left                    | Reference    |           |         |
| Midline                 | 1.12         | 1.07-1.17 | <.001   |
| Right                   | 1.00         | 0.97-1.03 | .9      |
| Unknown                 | 1.1          | 1.05-1.16 | <.001   |
| Histologic type         |              |           |         |
| Superficial spreading   | Reference    |           |         |
| Lentigo maligna         | 1.07         | 1.01-1.14 | .04     |
| Acral lentiginous       | 1.30         | 1.20-1.42 | <.001   |
| Amelanotic              | 0.82         | 0.56-1.19 | .3      |
| Nodular                 | 1.13         | 1.09-1.18 | <.001   |
| Desmoplastic            | 0.79         | 0.72-0.86 | <.001   |
| Spindle                 | 0.91         | 0.83-0.99 | .01     |
| Other                   | 1.03         | 0.90-1.18 | .69     |
| Unspecified             | 1.06         | 1.03-1.09 | <.001   |
| Breslow depth           |              |           |         |
| <1 mm                   | Reference    |           |         |
| 1.01-2.00 mm            | 1.12         | 1.08-1.16 | <.001   |
| 2.01-4.00 mm            | 1.25         | 1.19-1.30 | <.001   |
| >4 mm                   | 1.80         | 1.72-1.88 | <.001   |
| Unknown                 | 1.24         | 1.16-1.33 | <.001   |
| Ulceration              |              |           |         |
| Not present             | Reference    |           |         |
| Present                 | 5.69         | 5.40-5.99 | <.001   |
| Unknown                 | 1.28         | 1.24-1.31 | <.001   |
| Lymphovascular invasion |              |           |         |
| Not present             | Reference    |           |         |
| Present                 | 1.74         | 1.60-1.88 | <.001   |
| Unknown                 | 1.11         | 1.11-1.16 | <.001   |
| TNM pathologic stage    |              |           |         |
| Stage I                 | Reference    |           |         |
| Stage II                | 1.57         | 1.51-1.64 | <.001   |
| Stage III               | 3.28         | 3.15-3.41 | <.001   |
| Time to surgery         |              |           |         |
| 1-29 d                  | Reference    |           |         |
| 30-59 d                 | 1.02         | 0.99-1.04 | .12     |
| 60-89 d                 | 1.03         | 0.99-1.08 | .09     |
| 90-119 d                | 1.09         | 1.01-1.18 | .03     |
| ≥120 d                  | 1.12         | 1.02-1.22 | .02     |

CI, Confidence interval.

**Supplemental Table III.** Multivariate analysis of melanoma for TNM stage I

| Characteristic                               | Hazard ratio | 95% CI     | P value |
|----------------------------------------------|--------------|------------|---------|
| <b>Age at diagnosis</b>                      |              |            |         |
| <30                                          | Reference    |            |         |
| 30-39                                        | 1.52         | 1.13-2.04  | .005    |
| 40-49                                        | 2.23         | 1.7-2.93   | <.001   |
| 50-59                                        | 3.35         | 2.57-4.36  | <.001   |
| 60-69                                        | 4.75         | 3.65-6.18  | <.001   |
| 70-79                                        | 8.68         | 6.66-11.32 | <.001   |
| ≥80                                          | 21.66        | 16.6-28.26 | <.001   |
| <b>Sex</b>                                   |              |            |         |
| Female                                       | Reference    |            |         |
| Male                                         | 1.48         | 1.41-1.55  | <.001   |
| <b>Charlson-Deyo comorbidity score</b>       |              |            |         |
| 0                                            | Reference    |            |         |
| 1                                            | 1.45         | 1.37-1.54  | <.001   |
| ≥2                                           | 2.51         | 2.27-2.77  | <.001   |
| <b>Insurance type/status</b>                 |              |            |         |
| Medicare                                     | Reference    |            |         |
| Medicaid                                     | 1.6          | 1.34-1.91  | <.001   |
| Private insurance/<br>managed care           | 0.65         | 0.61-0.69  | <.001   |
| Other government                             | 0.94         | 0.74-1.21  | .648    |
| Not insured                                  | 1.11         | 0.93-1.33  | .264    |
| Insurance status<br>unknown                  | 0.74         | 0.63-0.87  | <.001   |
| <b>Facility type</b>                         |              |            |         |
| Academic/research<br>program                 | Reference    |            |         |
| Community cancer<br>program                  | 1.19         | 1.1-1.29   | <.001   |
| Comprehensive<br>community<br>cancer program | 1.06         | 1.01-1.11  | .017    |
| Integrated network<br>cancer program         | 1.13         | 1.04-1.23  | .004    |
| Other                                        | 0.78         | 0.25-2.43  | .671    |
| <b>Facility location</b>                     |              |            |         |
| East north central                           | Reference    |            |         |
| East south central                           | 1.16         | 1.06-1.26  | .001    |
| Middle Atlantic                              | 0.92         | 0.86-1     | .042    |
| Mountain                                     | 1            | 0.9-1.12   | .942    |
| New England                                  | 0.92         | 0.84-1.01  | .091    |
| Pacific                                      | 0.87         | 0.81-0.95  | .001    |
| South Atlantic                               | 0.96         | 0.9-1.03   | .292    |
| West north central                           | 0.96         | 0.88-1.05  | .42     |
| West south central                           | 1.08         | 0.97-1.2   | .165    |
| <b>Primary site</b>                          |              |            |         |
| Head and neck                                | Reference    |            |         |
| Trunk                                        | 0.77         | 0.73-0.82  | <.001   |
| Upper extremities                            | 0.76         | 0.71-0.8   | <.001   |
| Lower extremities                            | 0.63         | 0.58-0.68  | <.001   |
| Not specified                                | 1            | 0.77-1.3   | .982    |

Continued

**Supplemental Table III.** Cont'd

| Characteristic                 | Hazard ratio | 95% CI    | P value |
|--------------------------------|--------------|-----------|---------|
| <b>Laterality</b>              |              |           |         |
| Left                           | Reference    |           |         |
| Midline                        | 1.11         | 1.03-1.19 | .007    |
| Right                          | 0.99         | 0.95-1.04 | .74     |
| Unknown                        | 1.15         | 1.06-1.24 | .001    |
| <b>Histologic type</b>         |              |           |         |
| Superficial spreading          | Reference    |           |         |
| Acral lentiginous              | 1.25         | 1.03-1.51 | .022    |
| Amelanotic                     | 1.26         | 0.57-2.82 | .568    |
| Desmoplastic                   | 0.83         | 0.67-1.04 | .104    |
| Lentigo maligna                | 1            | 0.93-1.08 | .931    |
| Nodular                        | 1.27         | 1.15-1.4  | <.001   |
| Spindle                        | 1            | 0.82-1.21 | .973    |
| Other                          | 0.65         | 0.47-0.88 | .005    |
| Unspecified                    | 1.04         | 0.99-1.09 | .107    |
| <b>Breslow depth</b>           |              |           |         |
| <1 mm                          | Reference    |           |         |
| 1.01-2.00 mm                   | 1.35         | 1.29-1.41 | <.001   |
| <b>Ulceration</b>              |              |           |         |
| Not present                    | Reference    |           |         |
| Present                        | 7.11         | 5.9-8.58  | <.001   |
| Unknown                        | 1.22         | 1.14-1.31 | <.001   |
| <b>Lymphovascular invasion</b> |              |           |         |
| Not present                    | Reference    |           |         |
| Present                        | 1.41         | 0.94-2.09 | .093    |
| Unknown                        | 1.02         | 0.94-1.11 | .597    |
| <b>Time to treatment</b>       |              |           |         |
| 1-29 d                         | Reference    |           |         |
| 30-59 d                        | 1.05         | 1.01-1.1  | .029    |
| 60-89 d                        | 1.16         | 1.07-1.25 | <.001   |
| 90-119 d                       | 1.29         | 1.12-1.48 | <.001   |
| ≥120 d                         | 1.41         | 1.21-1.65 | <.001   |

CI, Confidence interval.

**Supplemental Table IV.** Multivariate analysis of melanoma by TNM stage II

| Characteristic                         | Hazard ratio | 95% CI    | P value |
|----------------------------------------|--------------|-----------|---------|
| Age at diagnosis                       |              |           |         |
| <30                                    | Reference    |           |         |
| 30-39                                  | 1.26         | 0.94-1.68 | .115    |
| 40-49                                  | 1.39         | 1.07-1.82 | .015    |
| 50-59                                  | 1.6          | 1.24-2.07 | <.001   |
| 60-69                                  | 1.88         | 1.45-2.43 | <.001   |
| 70-79                                  | 2.87         | 2.21-3.73 | <.001   |
| ≥80                                    | 5.26         | 4.05-6.82 | <.001   |
| Sex                                    |              |           |         |
| Female                                 | Reference    |           |         |
| Male                                   | 1.26         | 1.2-1.33  | <.001   |
| Charlson-Deyo comorbidity score        |              |           |         |
| 0                                      | Reference    |           |         |
| 1                                      | 1.25         | 1.17-1.33 | <.001   |
| ≥2                                     | 1.95         | 1.75-2.16 | <.001   |
| Insurance type/status                  |              |           |         |
| Medicare                               | Reference    |           |         |
| Medicaid                               | 1.24         | 1.04-1.48 | .015    |
| Private insurance/managed care         | 0.79         | 0.73-0.84 | <.001   |
| Other government                       | 1.05         | 0.81-1.36 | .726    |
| Not insured                            | 1.13         | 0.96-1.34 | .136    |
| Insurance status unknown               | 0.93         | 0.76-1.14 | .488    |
| Facility type                          |              |           |         |
| Academic/research program              | Reference    |           |         |
| Community cancer program               | 1.23         | 1.12-1.34 | <.001   |
| Comprehensive community cancer program | 1.06         | 1.01-1.11 | .028    |
| Integrated network cancer program      | 1.17         | 1.07-1.28 | .001    |
| Other                                  | 1.41         | 0.53-3.76 | .495    |
| Facility location                      |              |           |         |
| East north central                     | Reference    |           |         |
| East south central                     | 1.13         | 1.02-1.24 | .017    |
| Middle Atlantic                        | 0.96         | 0.88-1.04 | .33     |
| Mountain                               | 1.01         | 0.9-1.13  | .879    |
| New England                            | 0.92         | 0.82-1.02 | .113    |
| Pacific                                | 0.95         | 0.87-1.04 | .248    |
| South Atlantic                         | 1.03         | 0.96-1.11 | .44     |
| West north central                     | 0.95         | 0.86-1.05 | .328    |
| West south central                     | 1.18         | 1.04-1.32 | .008    |
| Primary site                           |              |           |         |
| Head and neck                          | Reference    |           |         |
| Trunk                                  | 0.95         | 0.89-1.03 | .203    |
| Upper extremities                      | 0.85         | 0.79-0.91 | <.001   |
| Lower extremities                      | 0.79         | 0.72-0.86 | <.001   |
| Not specified                          | 0.86         | 0.65-1.15 | .316    |

Continued

**Supplemental Table IV.** Cont'd

| Characteristic          | Hazard ratio | 95% CI    | P value |
|-------------------------|--------------|-----------|---------|
| Laterality              |              |           |         |
| Left                    | Reference    |           |         |
| Midline                 | 1.21         | 1.12-1.31 | <.001   |
| Right                   | 1.04         | 0.98-1.09 | .19     |
| Unknown                 | 1.11         | 1-1.22    | .048    |
| Histologic type         |              |           |         |
| Superficial spreading   | Reference    |           |         |
| Acral lentiginous       | 1.14         | 0.97-1.33 | .109    |
| Amelanotic              | 0.43         | 0.19-0.96 | .039    |
| Desmoplastic            | 0.71         | 0.63-0.8  | <.001   |
| Lentigo maligna         | 0.85         | 0.72-1    | .048    |
| Nodular                 | 0.99         | 0.92-1.06 | .716    |
| Spindle                 | 0.74         | 0.65-0.84 | <.001   |
| Other                   | 1.1          | 0.87-1.4  | .434    |
| Unspecified             | 0.94         | 0.88-1    | .068    |
| Breslow depth           |              |           |         |
| 1.01-2.00               | Reference    |           |         |
| 2.01-4                  | 1.35         | 1.26-1.45 | <.001   |
| >4                      | 2            | 1.85-2.15 | <.001   |
| Ulceration              |              |           |         |
| Not present             | Reference    |           |         |
| Present                 | 6.2          | 5.71-6.74 | <.001   |
| Unknown                 | 1.2          | 1.14-1.26 | <.001   |
| Lymphovascular invasion |              |           |         |
| Not present             | Reference    |           |         |
| Present                 | 1.73         | 1.46-2.05 | <.001   |
| Unknown                 | 1.1          | 1.02-1.2  | .02     |
| Time to treatment       |              |           |         |
| 1-29 d                  | Reference    |           |         |
| 30-59 d                 | 0.99         | 0.94-1.04 | .771    |
| 60-89 d                 | 0.96         | 0.88-1.04 | .296    |
| 90-119 d                | 1.03         | 0.89-1.2  | .647    |
| ≥120 d                  | 1.06         | 0.89-1.26 | .548    |

CI, Confidence interval.

**Supplemental Table V.** Multivariate analysis of melanoma by TNM stage III

| Characteristic                         | Hazard ratio | 95% CI    | P value |
|----------------------------------------|--------------|-----------|---------|
| Age at diagnosis                       |              |           |         |
| <30                                    | Reference    |           |         |
| 30-39                                  | 1.32         | 1.12-1.56 | .001    |
| 40-49                                  | 1.65         | 1.41-1.94 | <.001   |
| 50-59                                  | 1.79         | 1.53-2.1  | <.001   |
| 60-69                                  | 2.03         | 1.73-2.38 | <.001   |
| 70-79                                  | 2.47         | 2.09-2.92 | <.001   |
| ≥80                                    | 3.74         | 3.15-4.44 | <.001   |
| Sex                                    |              |           |         |
| Female                                 | Reference    |           |         |
| Male                                   | 1.28         | 1.21-1.34 | <.001   |
| Charlson-Deyo comorbidity score        |              |           |         |
| 0                                      | Reference    |           |         |
| 1                                      | 1.16         | 1.09-1.24 | <.001   |
| ≥2                                     | 1.7          | 1.51-1.9  | <.001   |
| Insurance type/status                  |              |           |         |
|                                        | Reference    |           |         |
| Medicaid                               | 1.32         | 1.09-1.6  | .004    |
| Medicare                               | 1.09         | 0.92-1.28 | .313    |
| Not insured                            | 1.13         | 0.94-1.37 | .187    |
| Other government                       | 1.18         | 0.92-1.52 | .2      |
| Private insurance/managed care         | 0.86         | 0.73-1.01 | .069    |
| Facility type                          |              |           |         |
| Academic/research program              | Reference    |           |         |
| Community cancer program               | 1.08         | 0.98-1.18 | .13     |
| Comprehensive community cancer program | 0.99         | 0.94-1.05 | .781    |
| Integrated network cancer program      | 1.02         | 0.92-1.13 | .661    |
| Facility location                      |              |           |         |
| East north central                     | Reference    |           |         |
| East south central                     | 1.16         | 1.04-1.28 | .007    |
| Middle Atlantic                        | 0.96         | 0.89-1.05 | .377    |
| Mountain                               | 0.96         | 0.86-1.08 | .521    |
| New England                            | 0.91         | 0.81-1.02 | .101    |
| Pacific                                | 0.97         | 0.88-1.06 | .455    |
| South Atlantic                         | 1.01         | 0.93-1.08 | .888    |
| West north central                     | 1.02         | 0.92-1.12 | .732    |
| West south central                     | 1            | 0.9-1.12  | .979    |
| Primary site                           |              |           |         |
| Head and neck                          | Reference    |           |         |
| Trunk                                  | 0.89         | 0.82-0.97 | .007    |
| Upper extremities                      | 0.77         | 0.71-0.84 | <.001   |
| Lower extremities                      | 0.79         | 0.72-0.86 | <.001   |
| Not specified                          | 0.74         | 0.6-0.92  | .006    |
| Laterality                             |              |           |         |
| Left                                   | Reference    |           |         |
| Midline                                | 1.12         | 1.02-1.22 | .021    |
| Right                                  | 0.99         | 0.94-1.04 | .619    |
| Unknown                                | 1.04         | 0.95-1.15 | .381    |

Continued

**Supplemental Table V. Cont'd**

| Characteristic          | Hazard ratio | 95% CI    | P value |
|-------------------------|--------------|-----------|---------|
| Histologic type         |              |           |         |
| Superficial spreading   | Reference    |           |         |
| Acral lentiginous       | 1.25         | 1.09-1.43 | .001    |
| Amelanotic              | 0.81         | 0.42-1.57 | .534    |
| Desmoplastic            | 0.65         | 0.51-0.83 | .001    |
| Lentigo maligna         | 0.92         | 0.74-1.16 | .484    |
| Nodular                 | 1.05         | 0.98-1.13 | .142    |
| Spindle                 | 0.85         | 0.69-1.04 | .114    |
| Other                   | 0.98         | 0.77-1.24 | .85     |
| Unspecified             | 1.05         | 0.98-1.12 | .152    |
| Breslow depth           |              |           |         |
| <1 mm                   | Reference    |           |         |
| 1.01-2.00 mm            | 0.82         | 0.76-0.89 | <.001   |
| 2.01-4.00 mm            | 1.09         | 1.01-1.17 | .024    |
| >4 mm                   | 1.62         | 1.51-1.73 | <.001   |
| Not specified           | 1.18         | 1.05-1.32 | .005    |
| Ulceration              |              |           |         |
| Not present             | Reference    |           |         |
| Present                 | 1.65         | 1.48-1.84 | <.001   |
| Unknown                 | 1.51         | 1.44-1.59 | <.001   |
| Lymphovascular invasion |              |           |         |
| Not present             | Reference    |           |         |
| Present                 | 1.57         | 1.4-1.76  | <.001   |
| Unknown                 | 1.2          | 1.11-1.31 | <.001   |
| Time to treatment       |              |           |         |
| 1-29 d                  | Reference    |           |         |
| 30-59 d                 | 1.03         | 0.98-1.09 | .201    |
| 60-89 d                 | 1.03         | 0.95-1.12 | .436    |
| 90-119 d                | 0.97         | 0.85-1.12 | .703    |
| ≥120 d                  | 0.98         | 0.85-1.14 | .836    |

CI, Confidence interval.
